# Supplementary material for: The Prevalence of Founder Mutations among Individuals from Families with Familial Pancreatic Cancer Syndrome
Source: PubMed Central journal article supplement — Cancer Res Treat. 2016 Jul 28;49(2):430–6. doi: 10.4143/crt.2016.217 (PMC5398394; doi:10.4143/crt.2016.217), 2016-07-28
Supplement: crt-2016-217-supple.pdf [file crt-2016-217-supple.pdf]

## Original Article

## Open Access

## The Prevalence of Founder Mutations among Individuals from Families with Familial Pancreatic Cancer Syndrome

**Marcin R. Lener**, PhD, **Aniruddh Kashyap**, MD, PhD, **Wojciech Kluźniak**, MSc, **Cezary Cybulski**, MD, PhD, **Agnieszka Soluch**, MSc, **Sandra Pietrzak**, MSc, **Tomasz Huzarski**, MD, PhD, **Jacek Gronwald**, MD, PhD, **Jan Lubiński**, MD, PhD

*Department of Genetics and Pathology, International Hereditary Cancer Center, Pomeranian Medical University in Szczecin, Szczecin, Poland*

### Supplementary Data

**Supplementary Table 1.** Occurrence of cancers among the mutation carriers

| Gene  | Mutation       | Cancer site        | No. of cases |
|-------|----------------|--------------------|--------------|
| CHEK2 | I157T          | Breast             | 6            |
|       |                | Cervix             | 1            |
|       |                | Pancreas           | 1            |
|       |                | Thyroid            | 1            |
|       |                | Malignant melanoma | 1            |
|       |                | Unknown            | 1            |
|       | IVS2+1G>A      | Breast             | 1            |
|       | 1100delC       | Breast             | 1            |
| PALB2 | del5395        | Cervix             | 1            |
|       | 509_510delGA   | Pancreas           | 1            |
| BRCA1 | 172_175delTTGT | Breast             | 1            |
|       | 5382insC       | Breast             | 1            |
|       | C61G           | Ovary              | 1            |
|       |                | Breast             | 1            |
| NBS1  | 657del5        | Pancreas           | 1            |
